# Supplementary material for: Development of a novel and useful methodology for the simultaneous analysis of multiclass contaminants in bovine fat
Source: Royal Society of Chemistry journal article supplement (doi:10.1039/d4ay00516c), 2024-01-01
Supplement: d4ay00516c1.pdf [file d4ay00516c1.pdf]

## Supporting Material

**Table ES11.** Chromatographic parameters for LC-MS/MS analysis of the target compounds.

Precursor ion classified as adduct type, fragment ions,  $t_R$ = Retention time, in minutes; DP= declustering potential and CE=collision energies, in V

| Compounds               | Precursor ion<br>[M+H] <sup>+</sup> | SRM<br>1 | SRM<br>2 | $t_R$<br>(min) | DP<br>(V) | CE SRM 1<br>(V) | CE SRM 2<br>(V) |
|-------------------------|-------------------------------------|----------|----------|----------------|-----------|-----------------|-----------------|
| Albendazole             | 266.1                               | 234.1    | 191.1    | 14.8           | 76        | 27              | 43              |
| Alachlor                | 270.2                               | 162.1    | 238.2    | 15.6           | 31        | 25              | 15              |
| Ametryn                 | 228.1                               | 186.2    | 96.1     | 14.5           | 36        | 25              | 35              |
| Atrazine                | 216                                 | 174      | 103.9    | 14.4           | 21        | 25              | 27              |
| Azinphos<br>methyl      | 318.1                               | 160.0    | 132.1    | 17.2           | 61        | 11              | 21              |
| Boscalid                | 343.1                               | 139.8    | 112.2    | 20.0           | 89        | 57              | 24              |
| Chlorantranilip<br>role | 484.1                               | 453.0    | 286.0    | 19.5           | 44        | 22              | 21              |
| Clomazone               | 240.0                               | 125.0    | 89.3     | 20.0           | 78        | 24              | 25              |
| Diazinon                | 305.2                               | 169.2    | 153.1    | 21.2           | 51        | 27              | 29              |
| Difenoconazole          | 406.1                               | 337.2    | 188.2    | 15.9           | 51        | 25              | 59              |
| Emamectin<br>benzoate   | 886.8                               | 158.0    | 126.0    | 16.1           | 52        | 40              | 46              |
| Eprinomectin            | 914.8                               | 186.1    | 154.0    | 17.0           | 18        | 20              | 40              |
| Enrofloxacin            | 360.2                               | 316.4    | 245.3    | 10.7           | 35        | 20              | 25              |
| Ethion                  | 385.1                               | 198.9    | 143.0    | 16.3           | 66        | 13              | 15              |
| Fluazuron               | 505.9                               | 158.1    | 348.9    | 21.7           | 86        | 36              | 33              |
| Flutriafol              | 302.0                               | 123.3    | 70.1     | 13.9           | 100       | 37              | 35              |
| Haloxifop<br>methyl     | 376.1                               | 316.1    | 288.1    | 15.8           | 85        | 22              | 36              |
| Hexythiazox             | 353.1                               | 228.1    | 168.1    | 16.7           | 70        | 23              | 34              |
| Isoprothilane           | 291.1                               | 231.0    | 189.0    | 15.2           | 51        | 17              | 31              |
| Kresoxym<br>methyl      | 314.0                               | 206.0    | 116.0    | 20.9           | 10        | 10              | 19              |
| Linuron d6              | 254.9                               | 185.0    | 160.1    | 14.9           | 72        | 21              | 24              |
| Malaoxon                | 315.4                               | 127.0    | 99.0     | 13.5           | 66        | 17              | 31              |
| Malathion               | 331.2                               | 284.9    | 99.0     | 15.0           | 56        | 11              | 35              |
| Mebendazole             | 296.2                               | 264.1    | 105.1    | 14.0           | 81        | 29              | 47              |
| Metconazole             | 320.2                               | 70.2     | 125.1    | 21.3           | 58        | 45              | 52              |
| Methiocarb              | 226.2                               | 121.1    | 169.1    | 14.9           | 78        | 26              | 13              |
| Moxidectin              | 640.4                               | 528.3    | 496.2    | 25.0           | 40        | 12              | 17              |
| Propiconazole           | 342.1                               | 159.0    | 69.1     | 21.2           | 46        | 37              | 33              |
| Pyraclostrobin          | 388.1                               | 194.1    | 163.1    | 15.8           | 67        | 17              | 39              |
| Spinosyd A              | 732.6                               | 142.2    | 98.3     | 20.6           | 198       | 44              | 43              |
| Spinosyd D              | 746.4                               | 142.5    | 189.4    | 21.0           | 110       | 41              | 45              |
| Spiroxamine             | 298.1                               | 100.2    | 144.2    | 19.7           | 90        | 28              | 40              |
| Tebufenozide            | 353.5                               | 297.1    | 133.1    | 15.5           | 41        | 11              | 23              |

|                 |                                                         |                  |                  |                                |                   |                         |                         |
|-----------------|---------------------------------------------------------|------------------|------------------|--------------------------------|-------------------|-------------------------|-------------------------|
| Tetraconazole   | 374.0                                                   | 161.2            | 69.9             | 15.0                           | 76                | 35                      | 37                      |
| Triclabendazole | 358.9                                                   | 343.9            | 274.0            | 16.1                           | 101               | 39                      | 55                      |
| Trifloxystrobin | 409.0                                                   | 206.0            | 145.0            | 15.8                           | 70                | 18                      | 56                      |
|                 | <b>Precursor ion<br/>[M+NH<sub>4</sub>]<sup>+</sup></b> | <b>SRM<br/>1</b> | <b>SRM<br/>2</b> | <b>t<sub>R</sub><br/>(min)</b> | <b>DP<br/>(V)</b> | <b>CE SRM 1<br/>(V)</b> | <b>CE SRM 2<br/>(V)</b> |
| Abamectin       | 890.6                                                   | 567.3            | 305.4            | 20.3                           | 75                | 18                      | 34                      |
| Doramectin      | 916.9                                                   | 331.3            | 145.0            | 17.9                           | 22                | 26                      | 48                      |
| Ivermectin      | 892.5                                                   | 569.3            | 307.2            | 18.8                           | 75                | 16                      | 48                      |
| Monensin        | 688.6                                                   | 461.3            | 617.6            | 18.4                           | 62                | 35                      | 33                      |
|                 | <b>Precursor ion [M-<br/>H]<sup>-</sup></b>             | <b>SRM<br/>1</b> | <b>SRM<br/>2</b> | <b>t<sub>R</sub><br/>(min)</b> | <b>DP<br/>(V)</b> | <b>CE SRM 1<br/>(V)</b> | <b>CE SRM 2<br/>(V)</b> |
| Fenhexamid      | 302.0                                                   | 265.9            | 263.9            | 6,7                            | -80               | -26                     | -28                     |
| Oxyclozanide    | 399.9                                                   | 363.8            | 261.8            | 7.1                            | -40               | -32                     | -31                     |
| Triflumuron     | 357.0                                                   | 154.0            | 175.9            | 7,0                            | -16               | -14                     | -22                     |

**Table ESI2.** Gas chromatography and mass spectrometer optimization parameters for the selected

analytes; precursor ion, t<sub>R</sub>= Retention time, in minutes; EC=collision energy, in kV at 70 eV.

| Compound            | Precursor ion | SR M1 | SR M2 | t <sub>R</sub> (min) | CE SRM 1 (kV) | CE SRM 2 (kV) |
|---------------------|---------------|-------|-------|----------------------|---------------|---------------|
| Beta cyfluthrin     | 226.1         | 206.1 | 199.1 | 25.8/26.0/26.1/26.2  | 14            | 6             |
| Bifenthrin          | 181.1         | 166.1 | 153.1 | 21.4                 | 12            | 8             |
| Carbofuran          | 164.1         | 149.1 | 103.1 | 10,766               | 18            | 24            |
| Chlorfenvinphos     | 323.0         | 267.0 | 295.0 | 14.8/15.2            | 16            | 6             |
| Chlorpyrifos        | 313.9         | 257.9 | 285.9 | 13.8                 | 14            | 8             |
| Chlorpyrifos methyl | 285.9         | 93    | 270.9 | 12.8                 | 22            | 14            |
| Coumaphos           | 362.0         | 109.0 | 226.0 | 25.1                 | 16            | 14            |
| Cypermethrin        | 181.1         | 152.1 | 127.1 | 26.4/26.6/26.7/26.8  | 22            | 22            |
| Deltamethrin        | 252.9         | 93.0  | 171.9 | 29.2/29.5            | 20            | 8             |
| Endosulfan sulphate | 386.8         | 282.8 | 252.9 | 19.5                 | 10            | 16            |
| Fenthion            | 278.0         | 109.0 | 125.0 | 14.0                 | 20            | 20            |
| Fenvalerate         | 419.1         | 225.1 | 167.1 | 28.5                 | 6             | 12            |
| Fipronil            | 366.9         | 212.9 | 254.9 | 15.0                 | 30            | 22            |
| Iprodione           | 314           | 56.0  | 245.0 | 21.1                 | 12            | 22            |
| Lambda cyhalothrin  | 197.0         | 141.0 | 161.0 | 23.2                 | 8             | 12            |

|                     |       |           |           |           |    |    |
|---------------------|-------|-----------|-----------|-----------|----|----|
| Mirex               | 271.8 | 236.<br>8 | 238.<br>8 | 23.3      | 18 | 18 |
| p,p-DDD             | 235.0 | 165.<br>0 | 199.<br>0 | 18.4      | 24 | 14 |
| p,p-DDE             | 246.0 | 176.<br>0 | 211.<br>0 | 17.0      | 30 | 22 |
| p,p-DDT             | 235.0 | 165.<br>0 | 199.<br>0 | 19.7      | 24 | 16 |
| Parathion<br>methyl | 263.0 | 109.<br>0 | 136.<br>0 | 12.7      | 14 | 8  |
| Permethrin          | 183.1 | 153.<br>1 | 168.<br>1 | 24.7/25.0 | 14 | 14 |
| Pirimifos<br>methyl | 305.1 | 180.<br>1 | 290.<br>1 | 13.3      | 8  | 12 |
| Tau-<br>Fluvalinate | 250.1 | 55.0      | 200.<br>0 | 28.4/28.6 | 20 | 20 |
| Vinclozolin         | 285.0 | 212.<br>0 | 178.<br>0 | 12.7      | 12 | 14 |
